# Supplementary material
Source: Royal Society of Chemistry journal article supplement (doi:10.1039/d5nj04000k)
Supplement: d5nj04000k1.pdf [file d5nj04000k1.pdf]

**In situ grown AuNPs on MXene/rice husk biochar nanocomposites for high-performance electrochemical sensing of acetaminophen**

Yuyi Xia<sup>a,1</sup>, Zhongshu Duan<sup>a,1</sup>, Xiangrong Zeng<sup>a</sup>, Tao Chen<sup>a</sup>, Zesen Huang<sup>a</sup>, Xia Gong<sup>a,\*</sup>, Yangping Wen<sup>a,c,\*</sup>, Guixia Tan<sup>a</sup>, Mingfang Li<sup>a</sup>

<sup>a</sup>Key Laboratory of Chemical Utilization of Plant Resources of Nanchang, Institute of Functional Materials and Agricultural Applied Chemistry, Jiangxi Agricultural University, Nanchang 330045, People's Republic of China

<sup>b</sup> Key Laboratory of Crop Physiology, Ecology and Genetic Breeding, Ministry of Education, Jiangxi Agricultural University, Nanchang 330045.PR China

\*Corresponding author: Fax: +86-791-83802632, Tel.: +86-791-88537967

E-mail: gx13870698760@outlook.com, wenyangping1980@jxau.edu.cn

<sup>1</sup> Yuyi Xia and Zhongshu Duan are co-first authors and have made equal contributions to this study

**Number of pages:** 6

**Number of Figures:** 1 (Fig. S1)

**Number of Tables:** 2 (Table S1-S2)

## **Content**

- 1. Raman of MXene-AuNPs, RHB, RHB-MXene-AuNPs**
- 2. Effective surface area of different electrodes**
- 3. Performance comparison of different modified electrodes for the detection of APAP**

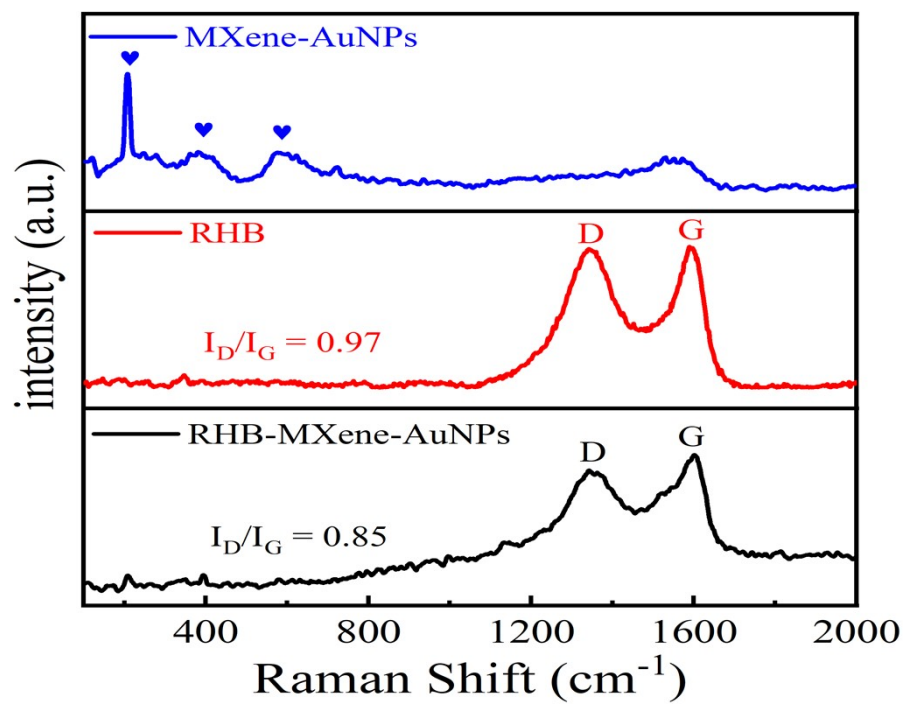

**Fig. S1.** Raman of MXene-AuNPs, RHB, RHB-MXene-AuNPs

**Table S1** Effective surface area of different electrodes

| Electrodes          | Effective surface area (cm <sup>2</sup> ) |
|---------------------|-------------------------------------------|
| MXene/GCE           | 0.436                                     |
| MXene-AuNPs/GCE     | 0.516                                     |
| RHB/GCE             | 1.739                                     |
| RHB-MXene-AuNPs/GCE | 1.667                                     |

**Table S2** Performance comparison of different modified electrodes for the detection of APAP

| Modified electrodes                    | Methods | Linear ranges<br>( $\mu\text{M}$ ) | LOD<br>( $\mu\text{M}$ ) | Ref.         |
|----------------------------------------|---------|------------------------------------|--------------------------|--------------|
| BaTiO <sub>3</sub> /GCE                | DPV     | 10 - 100.0                         | 0.350                    | 1            |
| TFPB-BD-COF/caCTF-1-700/COOH-MWCNT/GCE | DPV     | 0.6 - 150.0                        | 0.053                    | 2            |
| GTO(S)-Gr/GCE                          | DPV     | 0.05 - 1.5                         | 58.85                    | 3            |
| Ni <sub>2</sub> P NS/GCE               | I-t     | 0.5 - 4500                         | 0.107                    | 4            |
| Ni/C-400/GCE                           | DPV     | 0.2 - 53.75                        | 0.0404                   | 5            |
| Sn@C/GCE                               | DPV     | 0.2 - 100.0                        | 0.020                    | 6            |
| Ag-ZIF-67p/GCE                         | DPV     | 0.5 - 200.0                        | 0.200                    | 7            |
| RHB-MXene-AuNPs/GCE                    | DPV     | 0.03 - 8.88                        | 0.0214                   | This<br>work |

## References

1. Ali M, Sharma S, Singh R, Sharma K, Majhi S, Guin D and Tripathi CSP, *J. Electrochem. Soc.*, 2022, 169, 067512.
2. Sun L, Yang M, Guo H, Zhang T, Wu N, Wang M, Yang F, Zhang J and Yang W, *Colloids Surf., A*, 2022, 647, 129092.
3. Grace AA, Dharuman V and Hahn JH, *J. Alloys Compd.*, 2021, 886, 161256.
4. Wei M, Lu W, Liu G, Jiang Y, Liu X, Bai L, Cao X, Jia J and Wu H, *Chin. J. Chem.* 2021, 39, 1849-54.
5. Guo L, Hao L, Zhang Y, Yang X, Wang Q, Wang Z and Wang C, *Talanta*, 2021, 228, 122228.
6. Qin Y, Hang C, Huang L, Cheng H, Hu J, Li W and Wu J, *Microchem. J.*, 2022, 175, 107128.
7. Tang J, Liu Y, Hu J, Zheng S, Wang X, Zhou H and Jin B, *Microchem. J.*, 2020, 155, 104759.
